# Supplementary material
Source: PubMed Central journal article supplement (PMC4359926)
Supplement: supp_128.6.1230_JCS166322.pdf [file supp_128.6.1230_JCS166322.pdf]

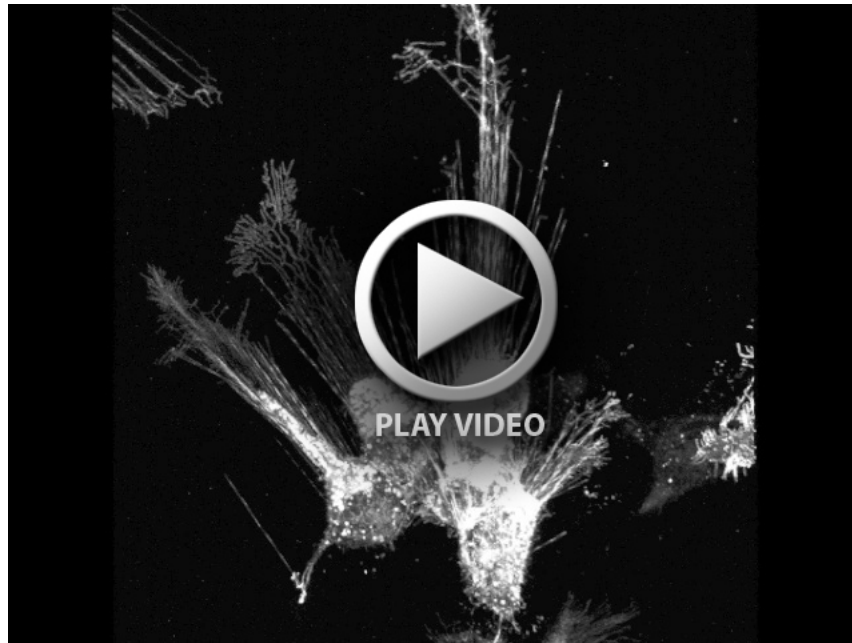

**Movie S1.** Lgr5 membrane protrusions are arborized at their contact with a substrate. Lgr5 (834del)-EGFP was transfected and imaged (See Fig 1I). Presented in this movie is a 3-dimensional reconstruction of a confocal Z-stack demonstrating protrusions that project downward toward the cell culture plate where they become arborized.

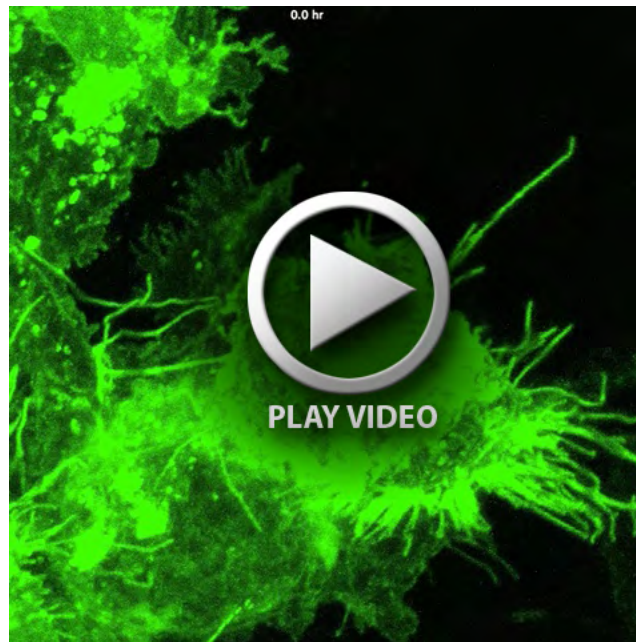

**Movie S2.** Short-term cytochalasin B treatment eliminates Lgr5 (834del)-EGFP membrane protrusions. HEK cells were Genecellin transfected with Lgr5 (834del)-EGFP. The next day cell media was replaced with serum free staining media (see materials and methods) containing 10 $\mu$ M cytochalasin B. Cells were optically sectioned and imaged live on a confocal microscope with a 37°C heated stage, beginning at time 0 and continuing every 30 minutes for a total of five hours. Z-sections were compressed into a maximum image projection and the time-course presented (2 frames/second).

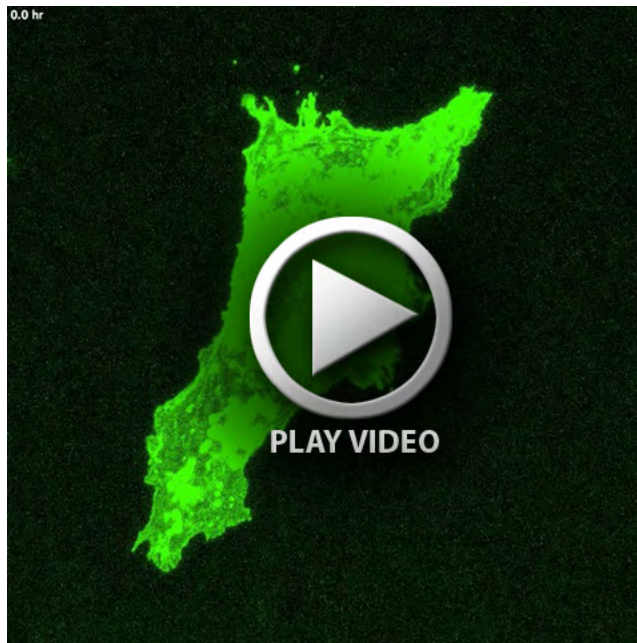

**Movie S3.** Lgr5 (834del)-EGFP membrane protrusions rapidly reform after cytochalasin B washout. Lgr5 (834del)-EGFP transfected HEK cells were incubated with 10 $\mu$ M cytochalasin B overnight. Cells were washed five times with staining media (see materials and methods) and then optically sectioned and imaged live on a confocal microscope with a 37°C heated stage, beginning at time 0 and continuing every 30 minutes for a total of 2.5 hours. Z-sections were compressed into a maximum image projection and the time-course presented (2 frames/second). (Stage drift gives the false appearance of cell movement).

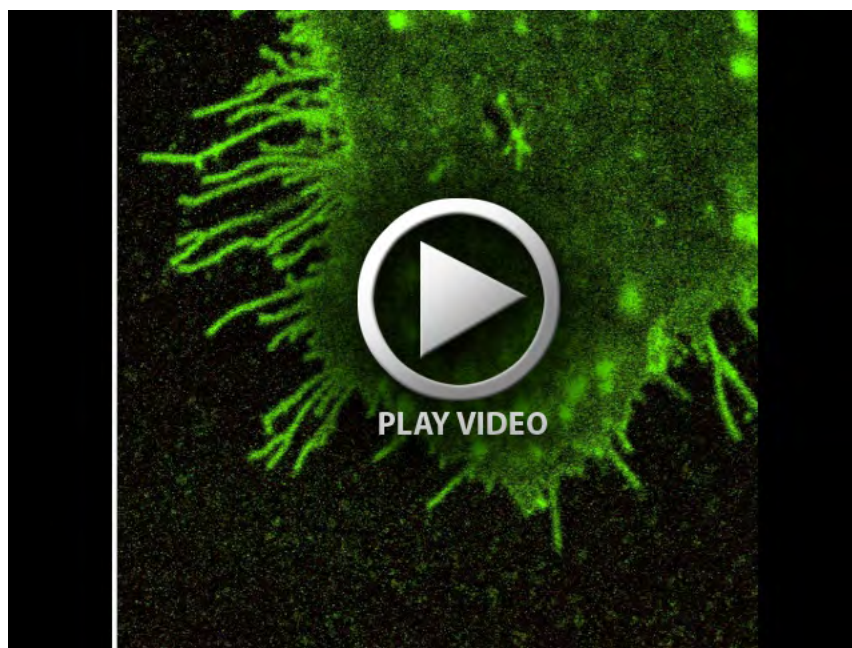

**Movie S4.** Concerted elongation of nascent membrane protrusions and retraction of plasma membrane forms elongated and branched cytonemes. The movie depicts data from Fig. 6A and represents 60 images (5 frames/second).

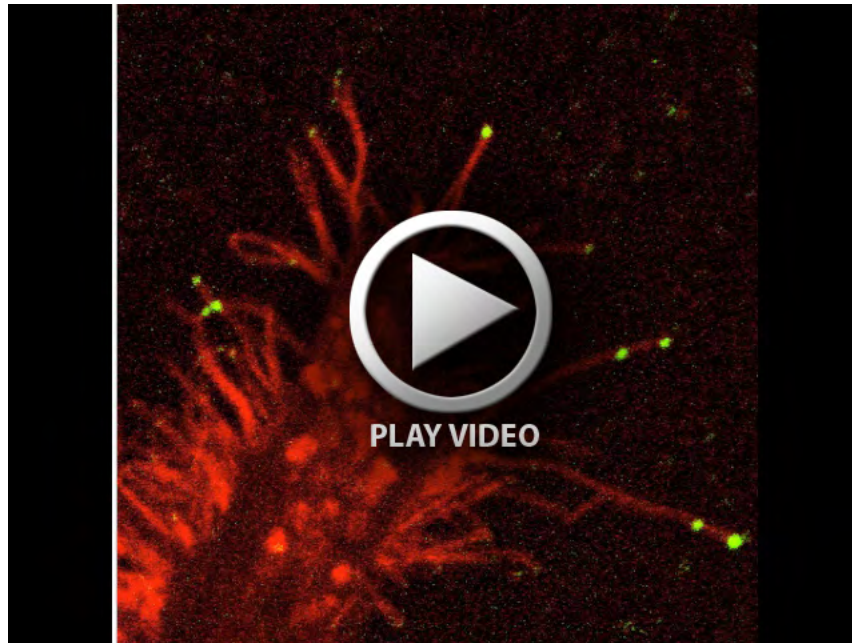

**Movie S5.** Lgr5-induced cytonemes as a platform for MyosinX transit. The movie depicts data from Fig. 6B and represents 60 images (5 frames/second).
